# Supplementary material
Source: ML conference proceedings conference paper supplement (https://aclanthology.org/2026.bionlp-2.31)
Supplement: SupplementaryMaterial [file pipelineVLM.pdf › latex/pipelineVLM.pdf]

Input  
Video

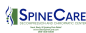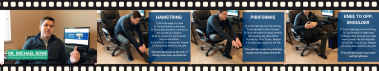

ASR Model

PySceneDetect

Video segments

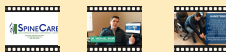

Transcription

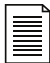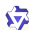

Qwen-VL-8B

Scene Descriptions  
with Timestamp

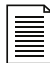

Fused contextual block

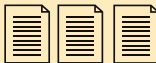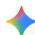

Gemini-3-flash preview

Inference-Time Contextual Guidance

Output  
Timestamp

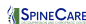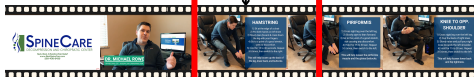

Start

End
